1 **PILS proteins provide a homeostatic feedback on auxin signaling output**

2

3 **Authors:**

4 Elena Feraru<sup>1,\*</sup>, Mugurel I. Feraru<sup>1</sup>, Jeanette Moulinier-Anzola<sup>1</sup>, Maximilian Schwihla<sup>1</sup>, Jonathan Ferreira  
5 Da Silva Santos<sup>1,2,3</sup>, Lin Sun<sup>1</sup>, Sascha Waidmann<sup>1,2,3</sup>, Barbara Korbei<sup>1</sup>, Jürgen Kleine-Vehn<sup>1,2,3\*</sup>

6

7 **Affiliations:**

8

9 <sup>1</sup>Institute of Molecular Plant Biology (IMPB), Department of Applied Genetics and Cell Biology,  
10 University of Natural Resources and Life Sciences, Vienna (BOKU), Muthgasse 18, 1190 Vienna, Austria

11 <sup>2</sup>Faculty of Biology, Chair of Molecular Plant Physiology (MoPP), University of Freiburg, 79104  
12 Freiburg, Germany

13 <sup>3</sup>Center for Integrative Biological Signalling Studies (CIBSS), University of Freiburg, 79104 Freiburg,  
14 Germany

15

16 \*Correspondence should be addressed to E.F. ([elena.feraru@boku.ac.at](mailto:elena.feraru@boku.ac.at)) or J.K.V. ([juergen.kleine-vehn@biologie.uni-freiburg.de](mailto:juergen.kleine-vehn@biologie.uni-freiburg.de))  
17

## 18 **Abstract**

19 Auxin is a crucial regulator of plant growth and development. Multiple internal and external signals  
20 converge at the regulation of auxin metabolism, intercellular transport, and signaling (Pernisova and  
21 Vernoux, 2021; Anfang and Shani, 2021). Considering this complexity, it remains largely unknown how  
22 plant cells monitor and ensure the homeostasis of auxin responses. PIN-LIKES (PILS) intracellular auxin  
23 transport facilitators at the endoplasmic reticulum (ER) are suitable candidates to buffer cellular auxin  
24 responses, because they limit nuclear abundance and signaling of auxin (Barbez et al., 2012; Beziat et al.,  
25 2017; Feraru et al., 2019; Sun et al., 2020). We used forward genetics to identify mechanisms that define  
26 the PILS6 protein abundance and thereby auxin signaling outputs. We screened for *gloomy* and *shiny* *pils*  
27 (*gasp*) mutants that define the levels of PILS6-GFP under a constitutive promoter. In this study, we show  
28 that *GASPI* encodes for an uncharacterized RING/U-box superfamily protein and impacts on auxin  
29 signaling output. We conclude that the low auxin signaling in *gasp1* mutants correlates with reduced  
30 abundance of PILS proteins, such as PILS5 and PILS6, which consequently balances auxin-related  
31 phenotypes. In agreement, we show that high and low auxin conditions increase and reduce PILS6 protein  
32 levels, respectively. Accordingly, non-optimum auxin concentrations are buffered by alterations in PILS6  
33 abundance, consequently leading to homeostatic auxin output regulation. We envision that this feedback  
34 mechanism provides robustness to auxin-dependent plant development.

35

## 36 **Results and Discussion**

### 37 **Forward genetic screen for potential regulators of PILS6**

38 Auxins play a cardinal role in plant growth control. Intercellular auxin transport is crucial for the graded  
39 tissue distribution of auxin and thereby provides positional cues. While we have a comprehensive  
40 understanding of the tissue distribution of auxin, we still lack a basic understanding of subcellular  
41 distribution and signaling of auxin. PIN-LIKES (PILS) are putative intracellular auxin transporters and  
42 induce intracellular auxin accumulation at the endoplasmic reticulum (ER) (Barbez et al., 2012). PILS  
43 proteins repress the nuclear abundance and signaling of auxin (Barbez et al., 2012; Beziat et al., 2017;  
44 Feraru et al., 2019; Sun et al., 2020), presumably by restricting auxin diffusion into the nucleus.  
45 Moderately high temperature induces PILS6 protein turnover, which consequently mediates auxin-  
46 dependent root thermomorphogenesis (Feraru et al., 2019; Fonseca de Lima et al., 2021), indicating that  
47 posttranslational mechanisms define PILS activity and thereby plant adaptation. To further address these  
48 uncharted aspects of plant development, we performed a forward genetic screen, using a constitutive  
49 PILS6 expression line fused to GFP (*p35::PILS6-GFP*; hereafter named *PILS6<sup>OE</sup>*), and screened the  
50 progeny of about 5,000 M1 ethyl methanesulfonate (EMS)-mutagenized *PILS6<sup>OE</sup>* seeds (Figure 1A). We  
51 germinated the *PILS6<sup>OE</sup>* seedlings under standard growth conditions (21 °C) for three days and,

52 subsequently, shifted the plates for 24 h to 29 °C. Then, we evaluated the temperature-sensitive PILS6-  
53 GFP fluorescence intensity using an epifluorescence microscope. After re-screening, we identified 21  
54 mutants that showed either reduced (8) or enhanced (13) PILS6-GFP fluorescence intensity under these  
55 conditions. We accordingly named these mutants *gloomy and shiny pils* (*gasp*) (Figure 1A).

56

### 57 ***gasp1* is a suppressor of PILS6**

58 Among the eight mutants having reduced PILS6-GFP fluorescence signal intensity, we identified the  
59 *gasp1-1;PILS6<sup>OE</sup>* mutant that showed almost no PILS6-GFP fluorescence signal after 24 h exposure to 29  
60 °C (Supplemental Figure 1). Notably, when grown under standard temperature of 21 °C, *gasp1-1* mutation  
61 caused already a dramatic (85 %) reduction of PILS6-GFP fluorescence intensity when compared to wild  
62 type backgrounds (Figures 1B, 1C, Supplemental Figure 1). This finding indicates that the *gasp1-1*  
63 mutation affects PILS6-GFP protein abundance independently of moderately high temperature. In  
64 accordance with its negative effect on the fluorescence intensity of PILS6-GFP, *gasp1-1* mutation  
65 alleviated the short root phenotype of *PILS6<sup>OE</sup>* by 15 % (Figures 1D, 1E). Therefore, we identified *gasp1-*  
66 *1* mutant as a suppressor of PILS6 under standard growth temperature.

67

### 68 ***GASPI* encodes for a RING/U-box superfamily gene**

69 To identify the causal *GASPI* gene, we established a pool of *gasp1-1;PILS6<sup>OE</sup>* individuals isolated from a  
70 F2 backcross (*gasp1-1;PILS6<sup>OE</sup>* crossed to *PILS6<sup>OE</sup>*). We, accordingly, re-sequenced the genome of this  
71 pooled mutant population as well as a pool of non-mutagenized *PILS6<sup>OE</sup>* control seedlings using the  
72 Illumina and DNBseq™ platform. By comparing the sequencing results of the two samples, we identified  
73 a single nucleotide polymorphism (SNP) in the uncharacterized, protein coding gene AT3G05545, which  
74 belongs to the RING/U-box superfamily protein, H2-type (Kraft et al., 2005; Stone et al., 2005). The  
75 *gasp1-1* mutation causes a C-to-T mutation, resulting in a proline (P) - to - leucine (L) amino acid  
76 substitution at the position 274 (Figure 2A, Supplemental Figure 2A). P274L is not in a conserved region  
77 of *GASPI*, but a leucine substitution of a proline residue may have dramatic structural and functional  
78 consequences (Vilson et al., 1989; Molnar et al., 2016).

79 To confirm that *gasp1-1* mutation in AT3G05545 gene is indeed responsible for the suppression  
80 of *PILS6<sup>OE</sup>*, we isolated a second mutant allele (SALK\_091345; hereafter called *gasp1-2*) from the Salk  
81 collection of T-DNA insertion lines (Alonso et al. 2003) (Supplemental Figure 2A). *GASPI* transcripts  
82 were not detectable in the *gasp1-2* allele, indicating a full knockout of *GASPI* (Supplemental Figure 2B).  
83 When crossed to *PILS6<sup>OE</sup>* (*gasp1-2;PILS6<sup>OE</sup>*), *gasp1-2* reduced PILS6-GFP fluorescence intensity and,  
84 consequently, rescued total root length (Figures 2B-2E). Next, we crossed *gasp1-1;PILS6<sup>OE</sup>* to the *gasp1-*  
85 *2;PILS6<sup>OE</sup>* allele as well as to the *PILS6<sup>OE</sup>* control line. In contrast to the control cross, the allelic test

86 between *gasp1-1* and *gasp1-2* showed that the PILS6-GFP intensity and PILS6<sup>OE</sup> phenotypes remained  
87 suppressed in the F1 generation (Figures 2F-2H; Supplemental Figure 2C). Altogether, we concluded that  
88 defects in the *GASP1* are responsible for the phenotypes observed in the *gasp1-1;PILS6OE*.

89

### 90 ***GASP1* defines PILS5 and PILS6 protein abundance**

91 To assess the specificity of the *GASP1*, we crossed *gasp1-2* to the PILS5 overexpression line  
92 (*p35S::PILS5-GFP; PILS5<sup>OE</sup>*). Similar to *PILS6<sup>OE</sup>*, PILS5-induced reduction in main root growth was also  
93 suppressed in *gasp1-2;PILS5<sup>OE</sup>* (Supplemental Figures 2D, 2E). PILS5 overexpression also represses dark-  
94 grown hypocotyl growth (Barbez et al., 2012; Beziat et al., 2017), which was as well alleviated by the  
95 *gasp1-2* mutation (Figures 2I, 2J). In agreement, the PILS5-GFP signal intensity was strongly reduced in  
96 *gasp1-2;PILS5OE* dark-grown hypocotyls (Figures 2K, 2L), showing that *GASP1* affects at least two  
97 PILS proteins, in distinct tissues and growth conditions.

98 To directly address whether the *GASP1* indeed affects PILS5 and PILS6 protein abundance, we  
99 subsequently used quantitative western blots. In accordance with the reduced PILS5/6-GFP fluorescence  
100 intensity, *gasp1* mutants displayed reduced PILS5 and PILS6 protein levels in the dark-grown hypocotyls  
101 and light-grown seedlings, respectively (Figure 3A; Supplemental Figures 3A, 3B). We, accordingly,  
102 conclude that *GASP1* defines the abundance of PILS proteins, such as PILS5 and PILS6.

103 *GASP1* belongs to the RING/U-box superfamily and plays a role as an E3 ubiquitin ligase (Kraft  
104 et al., 2005; Stone et al., 2005). RING E3 ubiquitin ligases typically mediate the ubiquitination of target  
105 proteins, where K48-linked ubiquitination recruits these targets for degradation via the 26S proteasome  
106 (Joazeiro and Weissman, 2000; Smalle and Vierstra, 2004; Vierstra, 2009). To address if *GASP1* could  
107 directly modulate PILS proteins abundance at the ER membrane, we generated a transgenic line  
108 overexpressing GFP-*GASP1* fusion. *35S::GFP-GASP1* lines displayed weak but ubiquitous signal in the  
109 root (Supplemental Figure 3C). In agreement with its predicted localization ([https://suba.live/suba-  
110 app/factsheet.html?id=AT3G05545](https://suba.live/suba-app/factsheet.html?id=AT3G05545); Hooper et al., 2017), GFP-*GASP1* was detectable in the nucleus, but  
111 showed also cytosolic localization (Figure 3B). Although the GFP-*GASP1* appeared enriched in the  
112 perinuclear regions of light-grown seedlings, we did not detect pronounced association with the ER and,  
113 accordingly, GFP-*GASP1* did not show co-localization with PILS3-RFP (Figures 3B, 3C). In addition,  
114 *GASP1* did not interact with PILS3 or PILS5 proteins in a yeast mating-based split-ubiquitin system  
115 (Supplemental Figure 3D). Even though we cannot fully rule out a direct interaction *in planta*, we assume  
116 that the putative E3 ubiquitin ligase *GASP1* rather indirectly affects the protein abundance of PILS5 and  
117 PILS6. Considering that E3 ligases are typically negative regulators of their clients, the reduced PILS5  
118 and PILS6 abundance in *gasp1* mutants also questions the direct impact of the E3 ubiquitin ligase *GASP1*.  
119 Either *GASP1* plays an unusual role for an E3 ligase or it defines the ubiquitination and, hence,  
120 degradation of cytosolic and/or nuclear proteins that are upstream regulators of PILS5 and PILS6 via the

121 ubiquitin-26S proteasome pathway. To test if the degradation of the PILS proteins is affected by the  
122 disturbance of the ubiquitin-26S proteasome pathway, we subsequently used MG132 and Bortezomib  
123 (BTZ) to pharmacologically interfere with the proteasome function in *Arabidopsis* (Marshall et al., 2015;  
124 Yu et al., 2015; Wang et al., 2016). Seedlings of *PILS6OE* were treated for three hours with MG132 or  
125 BTZ, which caused a significant increase of PILS6-GFP fluorescence in roots when compared to the  
126 DMSO-treated control seedlings (Figure 3D, 3E), indicating that PILS6 protein abundance is regulated in  
127 a 26S proteasome-sensitive manner. Importantly, another ER membrane-localized protein, a component of  
128 the ERAD pathway, the RING E3 ligase DERLIN1 (Kirst et al., 2005) translationally fused to  
129 mSCARLET (*35S::DER1-mSCARLET*), is not affected by proteasome inhibition, indicating some  
130 specificity of this effect (Figures 3F, 3G). The pharmacological inhibition of the 26S proteasome also  
131 increased the PILS6-GFP fluorescence in *gasp1-1* and *gasp1-2* mutants (Figure 3E; Supplemental Figures  
132 3E-3G), indicating that other molecular components contribute to the proteasome effect on PILS6  
133 abundance. Collectively, our data shows that although the ubiquitin-26S proteasome activity is required  
134 for PILS6 degradation, PILS protein abundance is not directly controlled by the E3 ligase GASP1.

135

### 136 **Auxin signaling modulates PILS6 protein abundance**

137 We next addressed whether the reduced PILS5 and PILS6 protein abundance correlates with the expected  
138 increased nuclear auxin signaling output in *gasp1* (Barbez et al., 2012; Beziat et al., 2017; Feraru et al.,  
139 2019; Sun et al., 2020). To visualize the auxin signaling output in *gasp1-2*, we introduced the auxin  
140 response marker *DR5::GFP* by crossing. While *DR5::GFP* signal intensity was not distinguishable in the  
141 root tip of *gasp1-2* mutant and wild type (Supplemental Figures 4A, 4B), we, unexpectedly, observed  
142 reduced *DR5::GFP* signal in the upper vascular tissues of light-grown roots as well as dark-grown  
143 hypocotyls of *gasp1-2* mutant (Figures 4A-4D). In agreement, auxin responsive genes, such as *IAAI*,  
144 *IAA5*, *IAA7*, *SAUR19*, and *SAUR63*, showed reduced expression in the light-grown seedlings and in the  
145 dark-grown hypocotyls of *gasp1* mutants (Figures 4E, 4F). This finding suggests that *GASP1* is required  
146 to maintain auxin signaling output in roots and shoots, which is independent from its effect on PILS5 and  
147 PILS6 abundance (Figures 4E, 4F). The overexpression of PILS proteins also limits nuclear auxin  
148 signaling, but the repression of auxin signaling output was not additive in *gasp1-1;PILS6<sup>OE</sup>*, *gasp1-*  
149 *2;PILS6<sup>OE</sup>*, and *gasp1-2;PILS5<sup>OE</sup>* (Figures 4E, 4F), suggesting that the effect on PILS abundance balances  
150 the auxin response. This finding hints at a molecular mechanism in which the PILS abundance could relate  
151 to a homeostatic feedback mechanism on auxin signaling output.

152 This prompted us to address whether the diminished auxin signaling output observed in *gasp1*  
153 mutants could reflect an auxin impact on PILS proteins abundance. To test this, we used L-Kynurenin  
154 (KYN) to pharmacologically interfere with auxin biosynthesis and hence signaling (He et al., 2011). KYN  
155 applications indeed phenocopied *gasp1* mutants and decreased the PILS6-GFP fluorescence as well as

156 protein abundance (Figures 4G-4I; Supplemental Figure 4C). Conversely, 100 nM IAA treatment  
157 increased both PILS6-GFP fluorescence and protein abundance (Figures 4G-4I; Supplemental Figure 4C).  
158 These experiments suggest that high and low auxin signaling outputs in- and de-crease PILS6 abundance,  
159 respectively. In contrast, the ER membrane marker DER1-mScarlet did not show any response to the  
160 treatments with either KYN or IAA (Supplemental Figures 4D, 4E), suggesting certain specificity of this  
161 auxin response. This data proposes that auxin exerts a homeostatic feedback on its own signaling rate by  
162 controlling the abundance of PILS intracellular auxin transporters.

163

### 164 **Concluding remarks**

165 Our forward genetic screen performed to identify regulators of PILS6 protein turnover under moderately  
166 high temperature yielded 21 *gasp* mutants that either decreased (*gloomy*) or increased (*shiny*) *PILS6<sup>OE</sup>*  
167 traits. In this study, we investigated *gasp1-1* that repressed PILS6-GFP already under standard  
168 temperature and found that *GASP1* may function as a modulator of auxin signaling rates. *GASP1* encodes  
169 for an uncharacterized E3 ubiquitin ligase, from the H-type, that belongs to the RING/U-box superfamily  
170 protein, which supposedly mediates substrate specific ubiquitination (Kraft et al., 2005; Stone et al.,  
171 2005). The *gasp1* mutants display severe reduction in auxin signaling output, but in contrast merely  
172 increase phenotypic trait variations, and are largely not distinguishable from wild type seedlings. It is  
173 hence conceivable that homeostatic auxin responses may balance the molecular responses in *gasp1*. The  
174 biological role of *GASP1* remains largely unknown, but we show here that the severely reduced auxin  
175 signaling output in *gasp1* mutants is in part compensated by enhanced turnover of at least PILS5 and  
176 PILS6 proteins. Our data shows that *GASP1* does not directly interact with PILS proteins, such as PILS3  
177 or PILS5 heterologously expressed in yeast. We propose that the *GASP1* impact on auxin signaling output  
178 indirectly affects PILS5 and PILS6 turnover. We, accordingly, show that sub- and supra-optimum levels  
179 of auxin de- and increase PILS6 abundance at the ER, respectively. It remains to be seen how precisely  
180 auxin levels determine the turnover of PILS proteins. Such a response could involve the canonical  
181 TIR1/AFB auxin receptors and downstream signaling events, altering the yet to be defined PILS  
182 degradation mechanisms. Alternatively, auxin availability may structurally affect PILS proteins, which  
183 could alter their interaction with the degradation machinery.

184 PILS proteins define the nuclear abundance and signaling of auxin, which seems highly  
185 responsive to internal and external signal perturbations (Beziat et al., 2017; Feraru et al., 2019; Sun et al.,  
186 2020). Here, we propose a working model where an auxin impact on PILS abundance provides  
187 homeostatic feedback (Supplemental Figure F), enabling auxin signaling output to maintain its own  
188 cellular homeostasis. Altogether, we envision that a PILS-dependent feedback mechanism provides  
189 robustness to plant growth and development.

190

191 **Author contribution**

192 E.F., M.I.F., and J.K.-V. conceived the manuscript. E.F., M.I.F., J.M.-A., M.S., J.F.D.S.S., L.S., and S.W.  
193 performed experiments and analyzed data. M.I.F. made the figures. E.F and J.K.-V wrote the manuscript.  
194 E.F., B.K., and J.K.-V edited the manuscript.

195

196 **Acknowledgements and Funding**

197 We are grateful to BOKU-VIBT Imaging Center and M. Debreczeny for access and advice; L. Mach and  
198 R. Strasser for sharing equipment. This work was supported by the Austrian Science Fund (FWF)  
199 (Projects P 26591 and P 29754 to J.K.-V., P 30850-B32 to B.K., P 33497 to S.W., and Hertha Firnberg  
200 T728-B16 and Elise Richter V690-B25 to E.F.), European Research Council (AuxinER - ERC starting  
201 grant to J.K.-V.), and the German Science Fund (DFG) (Project 470007283 and CIBSS – EXC-2189 –  
202 Project ID 390939984 to J.K.-V.).

203

204 **Material and methods**

205 **Plant material**

206 *Arabidopsis thaliana* ecotype Col-0 (wild-type), *p35S::PILS5-GFP* (*PILS5<sup>OE</sup>*; Barbez et al., 2012),  
207 *p35S::PILS6-GFP* (*PILS6<sup>OE</sup>*; Barbez et al., 2012), *p35S::PILS3-RFP* (Barbez et al., 2012 and this study),  
208 *pDR5rev::GFP* (Benkova et al., 2003) were previously described. *gasp1-2* (SALK\_091345) was obtained  
209 from NASC (Alonso et al., 2003); *gasp1-1* was identified in this study.

210

211 **Growth conditions**

212 70 % ethanol-sterilized (1-2 min sterilization in paper bags, followed by 30 minutes drying) seeds were  
213 plated usually on one single line, uniformly spaced, in the upper part of Petri dishes containing 50 ml  
214 solidified Murashige and Skoog (MS) agar medium (0.8 % agar, 0.5 x MS, and 1 % sucrose, pH 5.9), then  
215 stratified for 3 days in the dark at 4 °C, and grown on vertically oriented plates in a plant cabinet equipped  
216 with above placed cool-white fluorescent bulbs and set at about 140  $\mu\text{mol}/\text{m}^2\text{s}^{-1}$ , long day photoperiod,  
217 and 21 °C. This ensures that all seedlings in that plate are exposed to the same light intensity and  
218 humidity, which results in low variability. For HT-related experiments, we used the growth conditions  
219 described in Feraru et al. 2019. Seedlings were grown on plates (in pairs), for four days, under 21 °C  
220 (standard temperature) and subsequently shifted for 24 h in a cabinet displaying similar settings, excepting  
221 the temperature that was 29 °C (moderately high temperature). The control plates remained in the cabinet  
222 equipped with standard conditions.

223

224 **EMS mutagenesis, forward genetic screen, and sequencing**

225 Roughly 10,000 seeds of *35S::PILS6-GFP (PILS6<sup>OE</sup>)* were soaked (gently shaking) for 10 hours in 0.1 M  
226 phosphate buffer, pH 7, containing 0.3 % (v/v) ethyl methanesulfonate (EMS). Prior mutagenesis, the  
227 seeds were soaked for 5 minutes in water containing 0.05 % Triton X, then rinsed three times with water.  
228 After mutagenesis, the seeds were rinsed 7 times with water, then dispersed as desired in 0.1 % agarose,  
229 and transferred to soil by pipetting. From about 5,400 mutagenized plants (M1), we harvested 360 pools  
230 (each pool containing about 15 M1), and screened under an Olympus stereomicroscope over 80,000 M2  
231 seedlings for individual seedlings with weaker or stronger fluorescence than *PILS6<sup>OE</sup>* control. The  
232 seedlings having different fluorescence intensity than the control were picked up, propagated, and  
233 confirmed in the next generation as *gloomy* and *shiny pils* (*gasp*) mutants.

234 For sequencing of *gasp1-1*, we crossed *gasp1-1;PILS6<sup>OE</sup>* to *PILS6<sup>OE</sup>* and selected in F2 the  
235 individuals showing *gasp1-1;PILS6<sup>OE</sup>* phenotype. A pool of seedlings weighting 100 mg was used to  
236 extract genomic DNA by using the DNeasy Plant Mini Kit (Qiagen), according to the manufacturer's  
237 instructions. A sample of more than 1.5 ug (> 13 ng/ul sample concentration) was sent for sequencing.  
238 Along, we sent a similar sample containing the *PILS6<sup>OE</sup>* control. The samples were sequenced using the  
239 DNBseq platform and the standard bioinformatics analysis was performed by the company. The company  
240 identified the different SNPs between each sample and *Arabidopsis thaliana* genome from the TAIR  
241 database, followed by SNP calling, annotation, and statistics. To identify the *gasp1-1* mutation, we  
242 compared the list of SNPs identified in the *gasp1-1;PILS6<sup>OE</sup>* with the list of SNPs identified in the  
243 *PILS6<sup>OE</sup>* sample. After elimination of common SNPs between the two samples and of those heterozygous  
244 and synonymous SNPs, we identified one single, typical EMS mutation.

245

#### 246 **Quantification of phenotypes**

247 For root and hypocotyl length measurements, seedlings were grown on vertically oriented plates in the  
248 light (root) or dark (hypocotyl). Plates were scanned with Epson Perfection V700 scanner and the length  
249 was measured by using ImageJ 1.41 software (<http://rsb.info.nih.gov/ij/>).

250

#### 251 **Confocal imaging and quantification**

252 Leica TCS SP5 confocal microscope was used for fluorescence imaging. Unless stated differently, 5-day-  
253 old seedlings were used. When treated prior imaging, the seedlings were either submerged in MS liquid  
254 medium (MG132, BTZ) or transferred on plates (IAA, KYN) containing the desired concentration of the  
255 drug or similar amount of solvent and kept in the plant cabinet for the duration specified in the text or  
256 figure legend. The mean gray value of the fluorescence intensity was quantified in a defined rectangle  
257 region of interest (ROI), marked on the images, by using "Quantify" tool of Leica software (LAS AF  
258 Lite).

259



## 260 Cloning

261 To generate *p35S::GFP-GASP1*, the GASP genomic fragment was cloned into the pDONR221 by using  
262 the primers B1\_GASP\_FP and B2\_GASP<sup>STOP</sup>\_RP listed in Table 1. The resulting entry clone was  
263 subsequently transferred to the gateway-compatible destination vector pK7WGF2 (Karimi et al., 2002).  
264 Transformed lines were selected on 100 mg/L Kanamycin in F1 and 25 mg/L Kanamycin in F2. For the  
265 split ubiquitin assay, we amplified the PILS3, PILS5, and GASP1 coding sequence without stop codon by  
266 using PILS3\_FP, PILS3<sup>NOSTOP</sup>\_RP, PILS5\_FP and PILS5<sup>NOSTOP</sup>\_RP, B1\_GASP\_FP, and  
267 B2\_GASP<sup>NOSTOP</sup>\_RP listed in Table 1. The fragments were firstly cloned into the pDONR221.  
268 Subsequently, we recombined the baits (PILS3 and PILS5) and prey (GASP1) into pMetYC-DEST  
269 (Grefen et al. 2007) and PNX35-DEST (Grefen & Blatt, 2012), respectively. We used Gibson Assembly  
270 (NEB) to generate *35S::DER1-mSCARLET*. The coding sequence of DER1 (DER1\_FP and DER1\_RP),  
271 the 35S promoter (35S\_FP and 35S\_RP), and mScarlet-i tag (mScarlet\_FP and mScarlet\_RP) were  
272 amplified by PCR using Q5 High-Fidelity DNA Polymerase (NEB). The fragments were then cloned into  
273 a linearized (EcoRV-HF-NEB) pPLV03 vector by using Gibson Assembly. The transformed lines were  
274 selected on 15 mg/L Phosphinothricin (Basta). *35S::PILS3-RFP* plasmid generated previously (Barbez et  
275 al., 2012) was transformed into Col-0 plants and the transformed lines were selected on 20 mg/L  
276 hygromycin.

277

## 278 Split Ubiquitin

279 For the split ubiquitin assay, the yeast strains THY.AP4 and THY.AP5 were transformed with bait and  
280 prey constructs, respectively, using a modified protocol from (Gietz & Woods, 2002). Approximately 100  
281  $\mu$ l of fresh yeast were scraped from YPD plates and resuspended in 200  $\mu$ l sterile H<sub>2</sub>O. The resuspended  
282 yeast was then centrifuged for 5 minutes at 2000 g and the supernatant removed. The yeast was then  
283 resuspended in 200  $\mu$ l Yeast transformation buffer (40 % PEG 3350, 200 mM LiAc, 100 mM DTT),  
284 added 10  $\mu$ l single stranded carrier DNA and 1  $\mu$ g of plasmid DNA and mixed by pipetting up and down.  
285 We incubated the yeast for 15 min at 30 °C and for 45 min at 45 °C, subsequently plated on SD medium,  
286 and incubated for 4 days at 28 °C. A pool of transformed colonies was mated as described in Grefen et al.  
287 2007. The selected diploid colonies were then incubated on plates contacting selective medium (SD -Trp, -  
288 Leu, -Ade, -His, -Ura) at 21 °C under light and dark conditions. Growth was recorded up to 9 days after  
289 plating.

290

## 291 Sequencing and genotyping

292 To identify *gasp1-1*, we amplified the genomic sequence with B1\_GASP1\_FP and B2\_GASP1<sup>STOP</sup>\_RP  
293 and sequenced the sequence around the mutation by using the primer GASP1\_FP6 listed in Table 1. To

294 genotype *gasp1-2*, we used a combination of *gasp1-2* and t-DNA insertion-specific primers listed in Table  
295 1.

296

### 297 **qRT-PCR Analysis**

298 It has been performed as described in Feraru et al., 2019. We used the InnuPREP Plant RNA Kit (Analytic  
299 Jena) to extract total RNA according to the manufacturer's recommendation. The RNA samples were  
300 treated with InnuPREP DNase I (Analytic Jena). To synthesize cDNA, 1 µg of RNA and the iSCRIPT  
301 cDNA Synthesis Kit (Bio-Rad) were used. qRT-PCRs were carried out in a C1000 Touch Thermal Cycler  
302 equipped with the CFX96 Touch Real-Time PCR Detection System (Bio-Rad) and using the Takyon  
303 qPCR Kit for SYBER assay (Eurogentec), according to the manufacturer's recommendation. Gene  
304 expression was normalized to the expression of *ACTIN2*. The primers used for qPCRs are listed in Table  
305 1.

306

### 307 **Western Blots**

308 5-day-old dark-grown hypocotyls were used for the experiment related to *PILS5<sup>OE</sup>* and 6-day-old total  
309 seedlings for the experiments related to *PILS6<sup>OE</sup>*. For IAA and KYN treatments, the seedlings were grown  
310 for five days on nylon mesh on MS plates, then transferred with the underlying mesh to the plates  
311 supplemented with IAA, KYN or similar amount of DMSO solvent, and harvested after 24 h. Protein  
312 extraction was performed as described in Moulinier-Anzola et al., 2020. Each sample contained 20 mg  
313 seedlings. The frozen plant material was ground using a Retsch mill and extracted in 150 µl buffer (65  
314 mM Tris [pH 6.8], 8 M urea, 10 % glycerin, 2 % SDS, 5 % β-mercaptoethanol and 0.25 % bromophenol  
315 blue). The samples were furthermore heated at 65 °C for 5 min and spun down before loading. Anti-GFP  
316 (Roche, 1:1000), monoclonal anti-α-Tubulin (Sigma, 1:100000), and goat anti-mouse IgG (Jackson  
317 ImmunoResearch, 1:40000) antibodies were used for detection of *PILS5<sup>OE</sup>*, *PILS6<sup>OE</sup>* and Tubulin.

318

319 The experiments presented in this study have been performed at least three times or in three replicates.

320

321 Table 1. Primers used in this study.

| Name                                                  | Sequence                                                 | Reference  |
|-------------------------------------------------------|----------------------------------------------------------|------------|
| <i>Cloning (and PCR amplification for sequencing)</i> |                                                          |            |
| B1_GASPI_FP                                           | GGGGACAAGTTTGTACAAAAAAGCAGGCTTTAT<br>GGGTTTAGGCAATAAGGGT | This study |
| B2_GASPI <sup>STOP</sup> _RP                          | GGGGACCACTTTGTACAAGAAAGCTGGGTTTTA<br>AGATGATCCTCCTCCGCC  | This study |

|                                |                                                       |                    |
|--------------------------------|-------------------------------------------------------|--------------------|
| B2_GASP1 <sup>NOSTOP</sup> _RP | GGGGACCACTTTGTACAAGAAAGCTGGGTTAGA<br>TGATCCTCCTCCGCCA | This study         |
| PILS3_FP                       | GATATCGAATTCCTGCAGCCCGGGGATGGTGAA<br>GCTTTTGGAG       | This study         |
| PILS3 <sup>NOSTOP</sup> _RP    | AAAGCTGGAGCTCCACCGCGGTGGCCTAAGCTA<br>CAAGCCACATG      | This study         |
| PILS5_FP                       | GATATCGAATTCCTGCAGCCCGGGGATGGGATT<br>CTGGTCGTTG       | This study         |
| PILS5 <sup>NOSTOP</sup> _RP    | AAAGCTGGAGCTCCACCGCGGTGGCTTAGACTA<br>ACAAGTGAAGGAAG   | This study         |
| DER1_FP                        | CTATTCTAGTCGAATGTCTTCTCCTGGCGAATTC                    | This study         |
| DER1_RP                        | GCCCTTGCTCACGTCGGTGAGACGATATGATC                      | This study         |
| 35S_FP                         | GGTCGACGGTATCGATAAGCTTGATGACTAGAG<br>CCAAGCTGATC      | This study         |
| 35S_RP                         | AGGAGAAGACATTCGACTAGAATAGTAAATTGT<br>AATGTTG          | This study         |
| mSarlet_FP                     | TCGTCTCACCGACGTGAGCAAGGGCGAGGCA                       | This study         |
| mSarlet_RP                     | TAACCCATTCCAAGTGAATTCGATCATAGATG<br>ACACCGCGCGC       | This study         |
| <i>Sequencing</i>              |                                                       |                    |
| GASP1_FP6                      | CTTCAATTATGTTCCATCTCG                                 | This study         |
| <i>Genotyping</i>              |                                                       |                    |
| gasp1-2_FP                     | CCGAATTCAATGTCGAGGAT                                  | This study         |
| gasp1-2_RP                     | TAAACCTGTGGTATCACGAA                                  | This study         |
| Salk_LB_1-3                    | ATTTTGCCGATTTCCGGAAC                                  | SIGnAL             |
| <i>qRT-PCR</i>                 |                                                       |                    |
| IAA1_FP                        | GTCAAAAACCTCAGAATCATGAAAGGA                           | This study         |
| IAA1_RP                        | TGCCTCGACCAAAAAGGTGTT                                 | This study         |
| IAA5_FP                        | AGACTGTTCTTTCTCCGGTACGA                               | This study         |
| IAA5_RP                        | ACCGGCGAAAAAGAGTCAAG                                  | This study         |
| IAA7_FP                        | TGAACGAGAGCAAGCTAATGAATC                              | This study         |
| IAA7_RP                        | AACGAGCATCCAGTCACCATCT                                | This study         |
| SAUR19_FP1                     | GGCTTAACGATCCCTTGTC                                   | Inoue et al., 2016 |
| SAUR19_RP1                     | TTTACAATGAATAAGTCTATTTCTAACTGAAGG                     | Inoue et al., 2016 |

|           | A                          |                        |
|-----------|----------------------------|------------------------|
| SAUR63_FP | CTGTTGTCCAGGAGCTATTGAAA    | This study             |
| SAUR63_RP | GGCCGAATCGAATGGTAATGTG     | This study             |
| ACT2_FP   | ATTCAGATGCCCAGAAGTCTTGTTCC | Schlereth et al., 2010 |
| ACT2_RP   | GCAAGTGCTGTGATTTCTTTGCTCA  | Schlereth et al., 2010 |
| GASP1_FP  | GGAGGCCCGCTAGAGGAAT        | This study             |
| GASP1_RP  | CCCACCTGCCTGATCTGAAG       | This study             |

322

### 323 References

- 324 1. Alonso, J.M., Stepanova, A.N., Leisse, T.J., Kim, C.J., Chen, H., Shinn, P., Stevenson, D.K.,  
325 Zimmerman, J., Barajas, P., Cheuk, R., et al. (2003). Genome-wide insertional mutagenesis of  
326 *Arabidopsis thaliana*. *Science* *301*, 653-657.
- 327 2. Anfang, M., and Shani, E. (2021). Transport mechanisms of plant hormones. *Curr Opin Plant Biol*  
328 *63*, 102055.
- 329 3. Barbez, E., Kubes, M., Rolcik, J., Beziat, C., Pencik, A., Wang, B., Rosquete, M.R., Zhu, J., Dobrev,  
330 P.I., Lee, Y., et al. (2012). A novel putative auxin carrier family regulates intracellular auxin  
331 homeostasis in plants. *Nature* *485*, 119-122.
- 332 4. Benkova, E., Michniewicz, M., Sauer, M., Teichmann, T., Seifertova, D., Jurgens, G., and Friml, J.  
333 (2003). Local, efflux-dependent auxin gradients as a common module for plant organ formation.  
334 *Cell* *115*, 591-602.
- 335 5. Beziat, C., Barbez, E., Feraru, M.I., Lucyshyn, D., and Kleine-Vehn, J. (2017). Light triggers PILS-  
336 dependent reduction in nuclear auxin signalling for growth transition. *Nat Plants* *3*, 17105.
- 337 6. Feraru, E., Feraru, M.I., Barbez, E., Waidmann, S., Sun, L., Gaidora, A., and Kleine-Vehn, J. (2019).  
338 PILS6 is a temperature-sensitive regulator of nuclear auxin input and organ growth in  
339 *Arabidopsis thaliana*. *Proc Natl Acad Sci U S A* *116*, 3893-3898.
- 340 7. Fonseca de Lima, C.F., Kleine-Vehn, J., De Smet, I., and Feraru, E. (2021). Getting to the Root of  
341 Belowground High Temperature Responses in Plants. *J Exp Bot*.
- 342 8. Gietz, R.D., and Woods, R.A. (2002). Transformation of yeast by lithium acetate/single-stranded  
343 carrier DNA/polyethylene glycol method. *Methods Enzymol* *350*, 87-96.
- 344 9. Grefen, C., and Blatt, M.R. (2012). Do calcineurin B-like proteins interact independently of the  
345 serine threonine kinase CIPK23 with the K<sup>+</sup> channel AKT1? Lessons learned from a menage a  
346 trois. *Plant Physiol* *159*, 915-919.
- 347 10. Grefen, C., Lalonde, S., and Obrdlik, P. (2007). Split-ubiquitin system for identifying protein-  
348 protein interactions in membrane and full-length proteins. *Curr Protoc Neurosci Chapter 5*, Unit  
349 5 27.
- 350 11. He, W., Brumos, J., Li, H., Ji, Y., Ke, M., Gong, X., Zeng, Q., Li, W., Zhang, X., An, F., et al. (2011). A  
351 small-molecule screen identifies L-kynurenine as a competitive inhibitor of TAA1/TAR activity in  
352 ethylene-directed auxin biosynthesis and root growth in *Arabidopsis*. *Plant Cell* *23*, 3944-3960.
- 353 12. Hooper, C.M., Castleden, I.R., Tanz, S.K., Aryamanesh, N., and Millar, A.H. (2017). SUBA4: the  
354 interactive data analysis centre for *Arabidopsis* subcellular protein locations. *Nucleic acids*  
355 *research* *45*, D1064-D1074.
- 356 13. Inoue, S.I., Takahashi, K., Okumura-Noda, H., and Kinoshita, T. (2016). Auxin Influx Carrier AUX1  
357 Confers Acid Resistance for *Arabidopsis* Root Elongation Through the Regulation of Plasma  
358 Membrane H<sup>+</sup>-ATPase. *Plant Cell Physiol* *57*, 2194-2201.

- 359 14. Joazeiro, C.A., and Weissman, A.M. (2000). RING finger proteins: mediators of ubiquitin ligase  
360 activity. *Cell* *102*, 549-552.
- 361 15. Karimi, M., Inze, D., and Depicker, A. (2002). GATEWAY vectors for Agrobacterium-mediated  
362 plant transformation. *Trends Plant Sci* *7*, 193-195.
- 363 16. Kirst, M.E., Meyer, D.J., Gibbon, B.C., Jung, R., and Boston, R.S. (2005). Identification and  
364 characterization of endoplasmic reticulum-associated degradation proteins differentially  
365 affected by endoplasmic reticulum stress. *Plant Physiol* *138*, 218-231.
- 366 17. Kraft, E., Stone, S.L., Ma, L., Su, N., Gao, Y., Lau, O.S., Deng, X.W., and Callis, J. (2005). Genome  
367 analysis and functional characterization of the E2 and RING-type E3 ligase ubiquitination  
368 enzymes of Arabidopsis. *Plant Physiol* *139*, 1597-1611.
- 369 18. Marshall, R.S., Li, F., Gemperline, D.C., Book, A.J., and Vierstra, R.D. (2015). Autophagic  
370 Degradation of the 26S Proteasome Is Mediated by the Dual ATG8/Ubiquitin Receptor RPN10 in  
371 Arabidopsis. *Mol Cell* *58*, 1053-1066.
- 372 19. Molnar, J., Szakacs, G., and Tusnady, G.E. (2016). Characterization of Disease-Associated  
373 Mutations in Human Transmembrane Proteins. *PloS one* *11*, e0151760.
- 374 20. Moulinier-Anzola, J., Schwihla, M., De-Araujo, L., Artner, C., Jorg, L., Konstantinova, N., Luschnig,  
375 C., and Korbei, B. (2020). TOLs Function as Ubiquitin Receptors in the Early Steps of the ESCRT  
376 Pathway in Higher Plants. *Molecular Plant* *13*, 717-731.
- 377 21. Pernisova, M., and Vernoux, T. (2021). Auxin Does the SAMba: Auxin Signaling in the Shoot  
378 Apical Meristem. *Cold Spring Harbor perspectives in biology* *13*.
- 379 22. Schlereth, A., Moller, B., Liu, W., Kientz, M., Flipse, J., Rademacher, E.H., Schmid, M., Jurgens, G.,  
380 and Weijers, D. (2010). MONOPTEROS controls embryonic root initiation by regulating a mobile  
381 transcription factor. *Nature* *464*, 913-916.
- 382 23. Smalle, J., and Vierstra, R.D. (2004). The ubiquitin 26S proteasome proteolytic pathway. *Annu*  
383 *Rev Plant Biol* *55*, 555-590.
- 384 24. Stone, S.L., Hauksdottir, H., Troy, A., Herschleb, J., Kraft, E., and Callis, J. (2005). Functional  
385 analysis of the RING-type ubiquitin ligase family of Arabidopsis. *Plant Physiol* *137*, 13-30.
- 386 25. Sun, L., Feraru, E., Feraru, M.I., Waidmann, S., Wang, W., Passaia, G., Wang, Z.Y., Wabnik, K., and  
387 Kleine-Vehn, J. (2020). PIN-LIKES Coordinate Brassinosteroid Signaling with Nuclear Auxin Input  
388 in Arabidopsis thaliana. *Curr Biol* *30*, 1579-1588 e1576.
- 389 26. Vierstra, R.D. (2009). The ubiquitin-26S proteasome system at the nexus of plant biology. *Nat*  
390 *Rev Mol Cell Biol* *10*, 385-397.
- 391 27. Vilsen, B., Andersen, J.P., Clarke, D.M., and MacLennan, D.H. (1989). Functional consequences of  
392 proline mutations in the cytoplasmic and transmembrane sectors of the Ca<sup>2+</sup>(+)-ATPase of  
393 sarcoplasmic reticulum. *The Journal of biological chemistry* *264*, 21024-21030.
- 394 28. Wang, R., Zhang, Y., Kieffer, M., Yu, H., Kepinski, S., and Estelle, M. (2016). HSP90 regulates  
395 temperature-dependent seedling growth in Arabidopsis by stabilizing the auxin co-receptor F-  
396 box protein TIR1. *Nature communications* *7*, 10269.
- 397 29. Yu, H., Zhang, Y., Moss, B.L., Bargmann, B.O., Wang, R., Prigge, M., Nemhauser, J.L., and Estelle,  
398 M. (2015). Untethering the TIR1 auxin receptor from the SCF complex increases its stability and  
399 inhibits auxin response. *Nat Plants* *1*.

400  
401 **Figure Legends**

402 **Figure 1. Forward genetic screen for GASP regulators of PILS6 function**

403 A. Graphical representation of the forward genetic screen performed for the identification of *gasp* mutants.  
404 EMS-mutagenized seedlings of *PILS6*<sup>OE</sup> were grown for four days under standard growth conditions of 21  
405 °C and subsequently transferred for 24 h to moderately high temperature (29 °C). The seedlings showing

406 either weaker (gloomy) or stronger (shiny) PILS6-GFP signal than *PILS6<sup>OE</sup>* were selected, confirmed, and  
407 identified as *gasp* mutants of *PILS6<sup>OE</sup>*. Overall, the *gloomy* and *shiny* mutants displayed enhanced and  
408 reduced growth when compared with *PILS6<sup>OE</sup>*, respectively.

409 B-E. *gasp1-1* mutant affects *PILS6<sup>OE</sup>* fluorescence and general growth under standard conditions of light  
410 and temperature. Confocal images (B) and quantification of signal intensity (C) show that *gasp1-1* reduces  
411 PILS6-GFP fluorescence. Scans (D) and quantification (E) of root growth at 5 DAG show that *gasp1-1*  
412 rescues the short root phenotype of *PILS6<sup>OE</sup>*. n = 17, 15 (C) and 19 (E); ns = not significant, \*\*\*P <  
413 0.0001, t-test and Mann-Whitney test (C) and One-way ANOVA and Tukey's multiple comparison test  
414 (E). Scale bars, 100  $\mu$ m (B) and 0,5 cm (D).

415 The white, dashed rectangle shows the ROI used to quantify the signal intensity.

416

### 417 **Figure 2. *gasp1* is defective in a RING/U-box superfamily gene**

418 A. Alignment of a short nucleotide sequence from wild-type (top) and mutated (bottom) *GASP* gene. The  
419 mutated SNP and the changed amino acid are depicted in red.

420 B-E. The T-DNA insertion *gasp1-2* allele mimics the *gasp1-1* EMS mutant. Confocal images (B), scans of  
421 light-grown seedlings at 5 DAG (D) and the respective quantifications (C, E) show that *gasp1-2* allele  
422 causes dramatic reduction of PILS6-GFP fluorescence in roots (B, C) and rescues the short root growth  
423 (D, E) of *PILS6<sup>OE</sup>*. n = 15 (C) and 15-19 (E); \*\*\*P < 0.0001, t-test and Mann-Whitney test (C) and ns =  
424 not significant, \*\*\*P < 0.05, One-way ANOVA and Tukey's multiple comparison test (E). Scale bars, 100  
425  $\mu$ m (B) and 0,5 cm (D).

426 F-H. Complementation test showing that *gasp* mutants are allelic. Confocal images (F) and quantifications  
427 of signal intensity (G) and root length (H) of the F1 crosses between *gasp1-1* and *gasp1-2* alleles in the  
428 *PILS6<sup>OE</sup>* backgrounds and the respective controls show that F1 *gasp1-1;PILS6<sup>OE</sup>xgasp1-2;PILS6<sup>OE</sup>* causes  
429 PILS6-GFP reduction in roots (F, G) and rescues the root growth defects of *PILS6<sup>OE</sup>* (H). n = 10-12 (G)  
430 and 67-84 (H); ns = not significant, \*P and \*\*\*P < 0.05, One-way ANOVA and Tukey's multiple  
431 comparison test (G, H). Scale bar, 100  $\mu$ m (F).

432 I-L. *gasp1-2* affects *PILS5<sup>OE</sup>* hypocotyl phenotype and PILS5-GFP fluorescence. Scans (I), confocal  
433 images (K) and quantifications of hypocotyl length (J) and signal intensity (L) show that *gasp1-2* mutant  
434 rescues the phenotype (I, J) and reduces PILS5-GFP signal intensity (K, L) the dark-grown hypocotyls of  
435 *PILS5<sup>OE</sup>*. n = 20-22 (J) and 15, 16 (L); ns = not significant, \*\*\*P < 0.05, One-way ANOVA and Tukey's  
436 multiple comparison test (J) and \*\*\*P < 0.0001, t-test and Mann-Whitney test (L). Scale bars, 0.5 cm (I)  
437 and 100  $\mu$ m (K).

438 The white, dashed rectangles show the ROIs used to quantify the signal intensity.

439

### 440 **Figure 3. GASP1 is an indirect regulator of PILS5 and PILS6 protein abundance**

441 A. Western blots showing detection of PILS6-GFP (in light-grown seedlings, left image) and PILS5-GFP  
442 (in dark-grown hypocotyls, right image). Note the decreased abundance of both PILS5- and PILS6-GFP in  
443 the *gasp1* mutants. Red asterisks show PILS5- and PILS6-GFP bands. The values written above the GFP  
444 bands represent the intensities that were normalized to the tubulin (left image) or Coomassie (right image)  
445 bands presented in Supplemental Figures 3A or 3B, respectively.

446 B,C. *35S::GFP-GASP1* localizes to the cytosol and nucleus. GFP-GASP1 localization is shown in the  
447 roots (left) and hypocotyls (right) of light- and dark-grown seedlings from a homozygous, F3 generation,  
448 respectively (B). GFP-GASP1 does not colocalize with the ER marker PILS3-RFP in a F1 cross (C). The  
449 yellow rectangle shows the region that is magnified in the inset. Scale bars, 50  $\mu\text{m}$  (B) and 25  $\mu\text{m}$  (C).

450 D,E. Proteasome inhibitors stabilize PILS6-GFP independently of GASP1. Confocal images (D) and  
451 quantification of signal intensity (E) show that a short treatment (3 h) with the proteasome inhibitors BTZ  
452 [50  $\mu\text{M}$ ] or MG132 [50  $\mu\text{M}$ ] stabilizes PILS6-GFP in WT (D, E) and in *gasp1* mutants (E).  $n = 7-9$ ; ns =  
453 not significant, \*P, \*\*P, \*\*\*P < 0.05, One-way ANOVA and Tukey's multiple comparison test (E). Scale  
454 bar, 50  $\mu\text{m}$  (D).

455 F,G. Proteasome inhibitors do not affect DER1-mScarlet. Confocal images (F) and quantification of signal  
456 intensity (G) show that a 3 h treatment with the proteasome inhibitors BTZ [50  $\mu\text{M}$ ] or MG132 [50  $\mu\text{M}$ ]  
457 does not affect DER1-mScarlet fluorescence intensity.  $n = 11-13$ ; ns = not significant, One-way ANOVA  
458 and Tukey's multiple comparison test (G). Scale bar, 50  $\mu\text{m}$  (F).

459 The white, dashed rectangles show the ROIs used to quantify the signal intensity.

460

#### 461 **Figure 4. Auxin signaling affects PILS6 protein abundance**

462 A-F. Auxin signaling is reduced in the *gasp1* mutants. Confocal images (A, C) and quantifications of  
463 signal intensity (B, D) show that *gasp1-2* mutation negatively affects *DR5::GFP* signal in the roots  
464 (differentiation zone is presented) (A, B) of light- and hypocotyls (C, D) of dark-grown seedlings. qPCR  
465 analysis showing the expression of some IAA and SAUR genes in the entire seedlings grown in the light  
466 (E) and hypocotyls of seedlings grown in the dark (F). Note the reduced expression of the auxin  
467 responsive genes in all transgenic lines.  $n = 16, 17$  (B) and  $9, 10$  (D); \*\*\*P < 0.0001, t-test and Mann-  
468 Whitney test (B, D). Scale bars, 50  $\mu\text{m}$  (A, C).

469 G-I. Auxin signaling modulates PILS6 protein abundance. Confocal images (G), quantification of signal  
470 intensity (H) and immunoblot with anti-GFP (I) show that 24 h treatment with either [100 nM] IAA or  
471 [1  $\mu\text{M}$ ] KYN increases or reduces PILS6-GFP abundance in roots of light-grown *PILS6<sup>OE</sup>* seedlings. Red  
472 asterisk (I) marks PILS6-GFP bands. The values written above the GFP bands (I) represent the intensities  
473 that were normalized to the tubulin bands presented in Supplemental Figure 4C.  $n = 17$ ; \*P, \*\*P < 0.05,  
474 One-way ANOVA and Tukey's multiple comparison test (H). Scale bar, 50  $\mu\text{m}$  (G).

475 The white, dashed rectangles show the ROIs used to quantify the signal intensity.

476  
477 **Figure 1S. *gasp1-1* regulates PILS6 independently of moderately high temperature**  
478 A,B.*gasp1-1* mutation affects *PILS6*<sup>OE</sup> already under standard growth conditions. Confocal images (A)  
479 and quantification of signal intensity (B) show that PILS6-GFP fluorescence is already weaker in the  
480 *PILS6*<sup>OE</sup> seedlings grown under 21 °C and is further reduced, similarly to the control seedlings, after 24 h  
481 exposure to 29 °C. n = 8; ns = not significant, \*\*\*P = 0.0007, t-test and Mann-Whitney test (B). Scale bar,  
482 100 μm (A).

483 The white, dashed rectangle shows the ROI used to quantify the signal intensity.

484  
485 **Figure 2S. *GASPI* encodes for a RING/U-box superfamily gene**  
486 A.Schematic representation of *GASPI* gene, according to PLAZA 5.0  
487 ([https://bioinformatics.psb.ugent.be/plaza/versions/plaza\\_v5\\_dicots/](https://bioinformatics.psb.ugent.be/plaza/versions/plaza_v5_dicots/)). Black arrowhead and arrow show  
488 the approximate positions of *gasp1-1* SNP and *gasp1-2* t-DNA insertion, respectively.

489 B.qPCR showing *GASPI* transcript. *GASPI* transcript is absent in *gasp1-2* mutant and unchanged in  
490 *gasp1-1* mutant. Wild type and *PILS6*<sup>OE</sup> were used as controls.

491 C.*gasp1* mutants are allelic. Scans of 7 DAG seedlings show that the F1 cross between *gasp1-1* and  
492 *gasp1-2* mutants in *PILS6*<sup>OE</sup> background rescues the short root growth of *PILS6*<sup>OE</sup>. Scale bar, 0.5 cm.

493 D,E.*gasp1-2* affects *PILS5*<sup>OE</sup> root phenotype. Scans (D) and quantification (E) show that *gasp1-2* allele  
494 rescues root growth of 5 DAG light-grown *PILS5*<sup>OE</sup> seedlings. n = 41-43; ns = not significant, \*\*\*P <  
495 0.05, One-way ANOVA and Tukey's multiple comparison test (E). Scale bar, 0.5 cm (D).

496  
497 **Figure 3S. *GASPI* affects indirectly the proteasome-dependent PILS6 protein abundance**

498 A,B.Controls for PILS5- and PILS6-GFP Western blots. Anti-Tubulin- (A) and Coomassie- (B) based  
499 normalizations were used for the Western blot analyses presented in Figure 3A.

500 C.*35S::GFP-GASPI* localization in roots. Three independent lines show weak but ubiquitous localization  
501 in 5 DAG light-grown seedlings. We used mainly line 28. Scale bar, 100 μm.

502 D.PILS3 and PILS5 proteins do not interact with *GASPI*. Neither PILS3 nor PILS5 interact with *GASPI*  
503 in the light (upper image) or dark (lower image) in the yeast mating-based split-ubiquitin system. NUbWT  
504 was used as a positive control, PNX35 as a negative control.

505 E-G.Proteasome inhibitors stabilize PILS6-GFP independently of *GASPI*. Confocal images (E, F) and  
506 BTZ/DMSO and MG132/DMSO ratios of signal intensity (G) show that a short treatment (3 h) with the  
507 proteasome inhibitors Bortezomib (BTZ; [50 μM]) or MG132 [50 μM] stabilizes PILS6-GFP in WT and  
508 *gasp1* mutants. The ratios were calculated with the values from Figure 3E. ns = not significant, One-way  
509 ANOVA and Tukey's multiple comparison test (G). Scale bars, 50 μm (E, F).

510 The white, dashed rectangles show the ROIs used to quantify the signal intensity.



511

512 **Figure 4S. Auxin feedback on PILS proteins**

513 A,B.*DR5::GFP* signal intensity is not affected in the very root tip of *gasp1-2* seedlings. Confocal images  
514 (A) and quantification of signal intensity (B) show slightly but not significantly weaker *DR5::GFP* signal  
515 intensity in the root tip of *gasp1-2* mutant grown in the light for 5 DAG. n = 15, 16; ns = not significant, t-  
516 test and Mann-Whitney test (B). Scale bar, 50  $\mu$ m (A).

517 C. Anti-Tubulin-based normalization was used for the Western blot analysis presented in Figure 4I.

518 D,E. Auxin signaling does not affect *35S::DER1-mScarlet*. Confocal images (D) and quantification of  
519 signal intensity (E) show that a 24 h treatment with either [100 nM] IAA or [1  $\mu$ M] KYN does not affect  
520 the fluorescence of DER1-mScarlet. n = 11; ns = not significant, One-way ANOVA and Tukey's multiple  
521 comparison test (E). Scale bar, 50  $\mu$ m (D).

522 F. Working model illustrating our findings. GASP1 modulates (directly or not) auxin signaling output,  
523 which further influences PILS6 protein stability. In return, PILS6 activity represses the abundance of  
524 auxin for nuclear auxin signaling. This intracellular feedback regulation between auxin and PILS6 may  
525 allow an optimal auxin concentration for fine-tuning auxin-dependent plant responses.

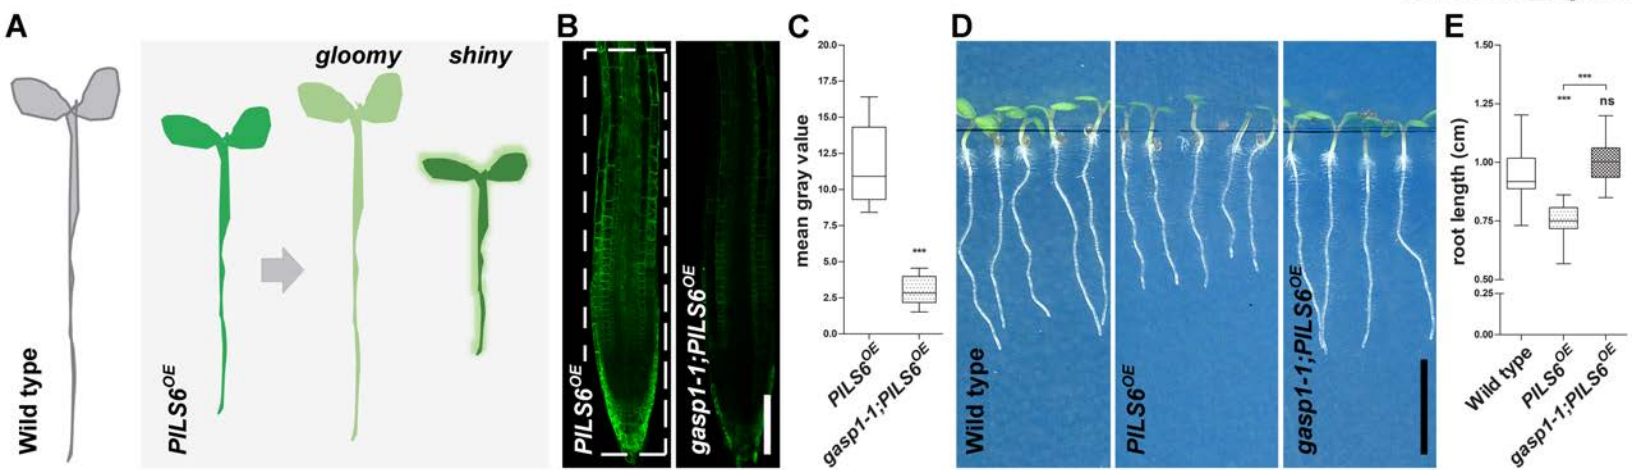

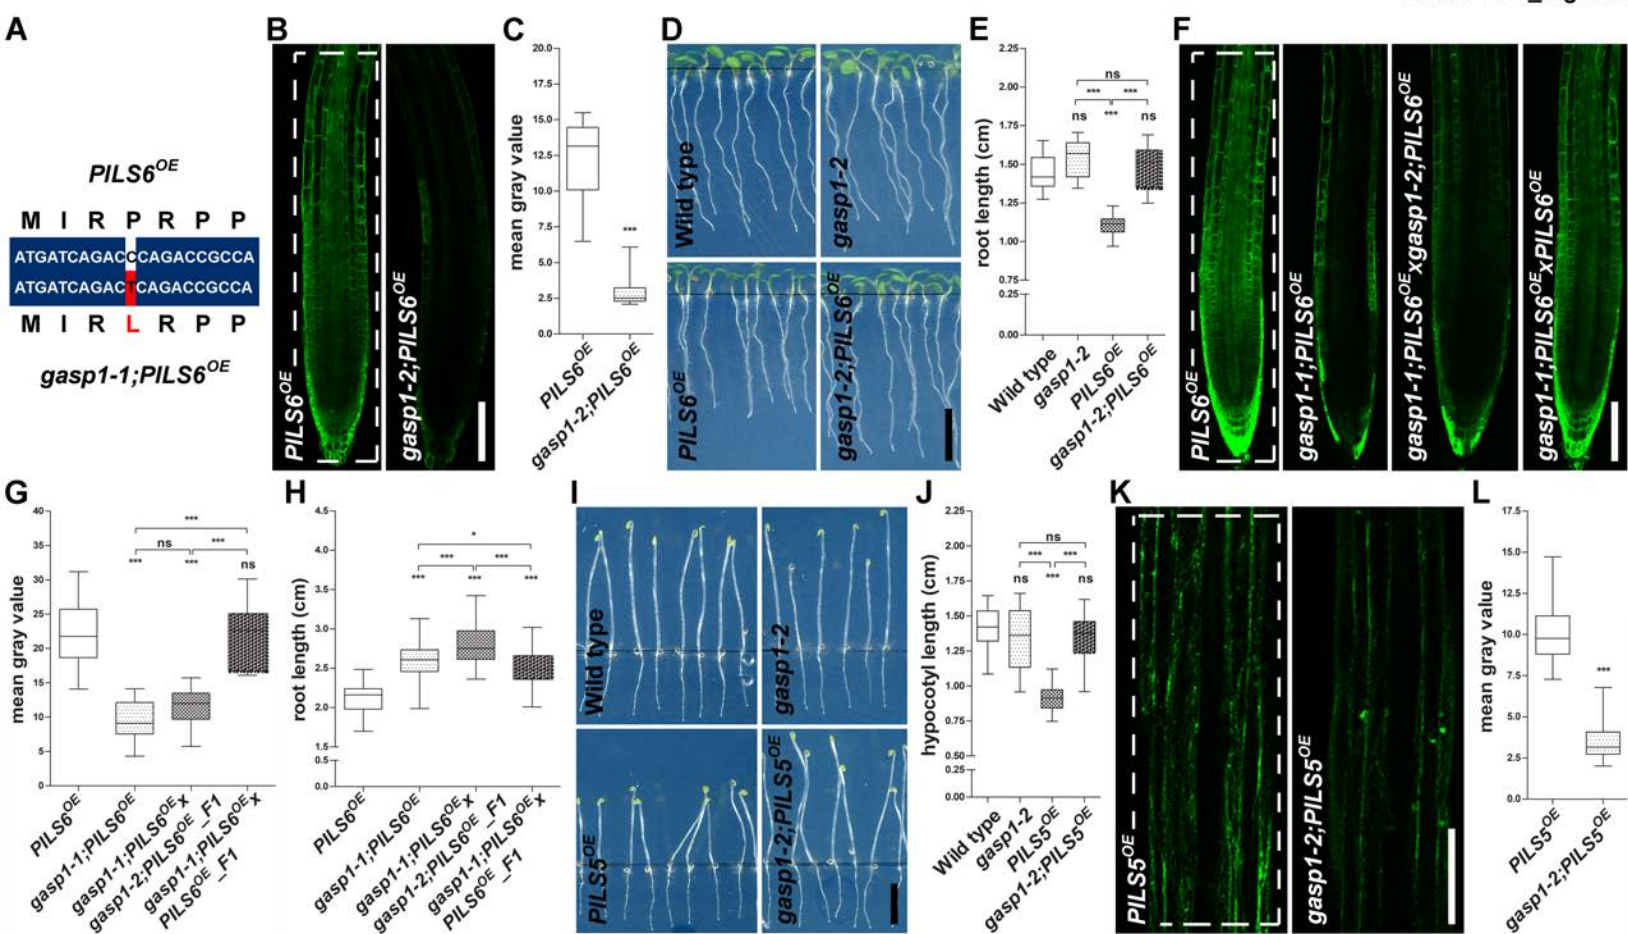

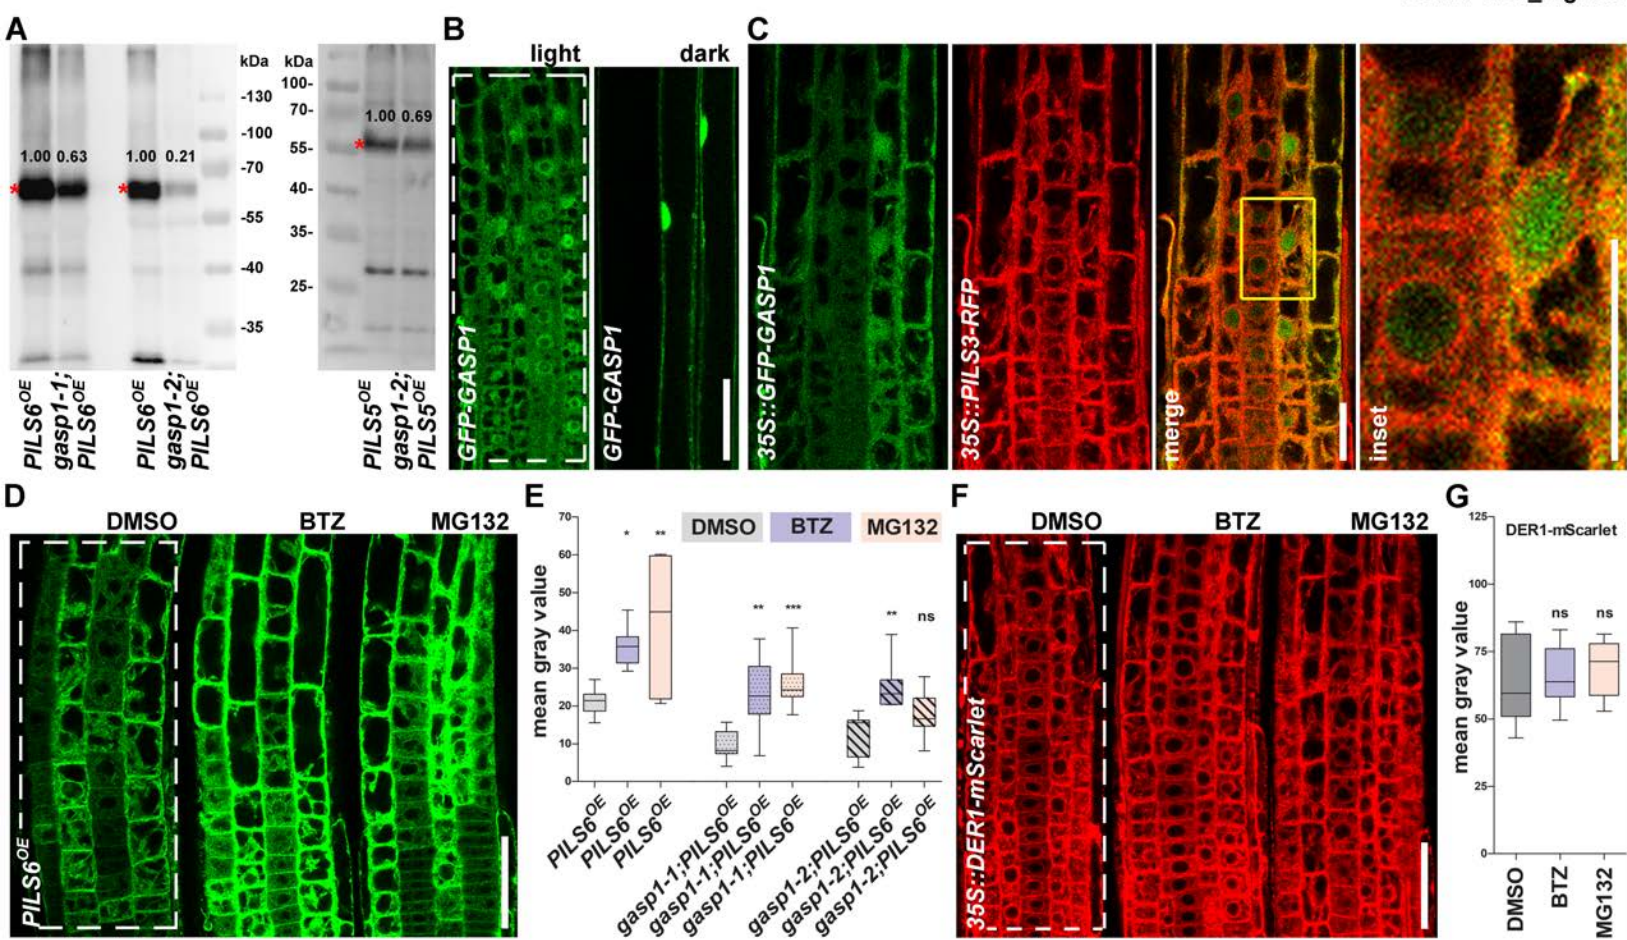

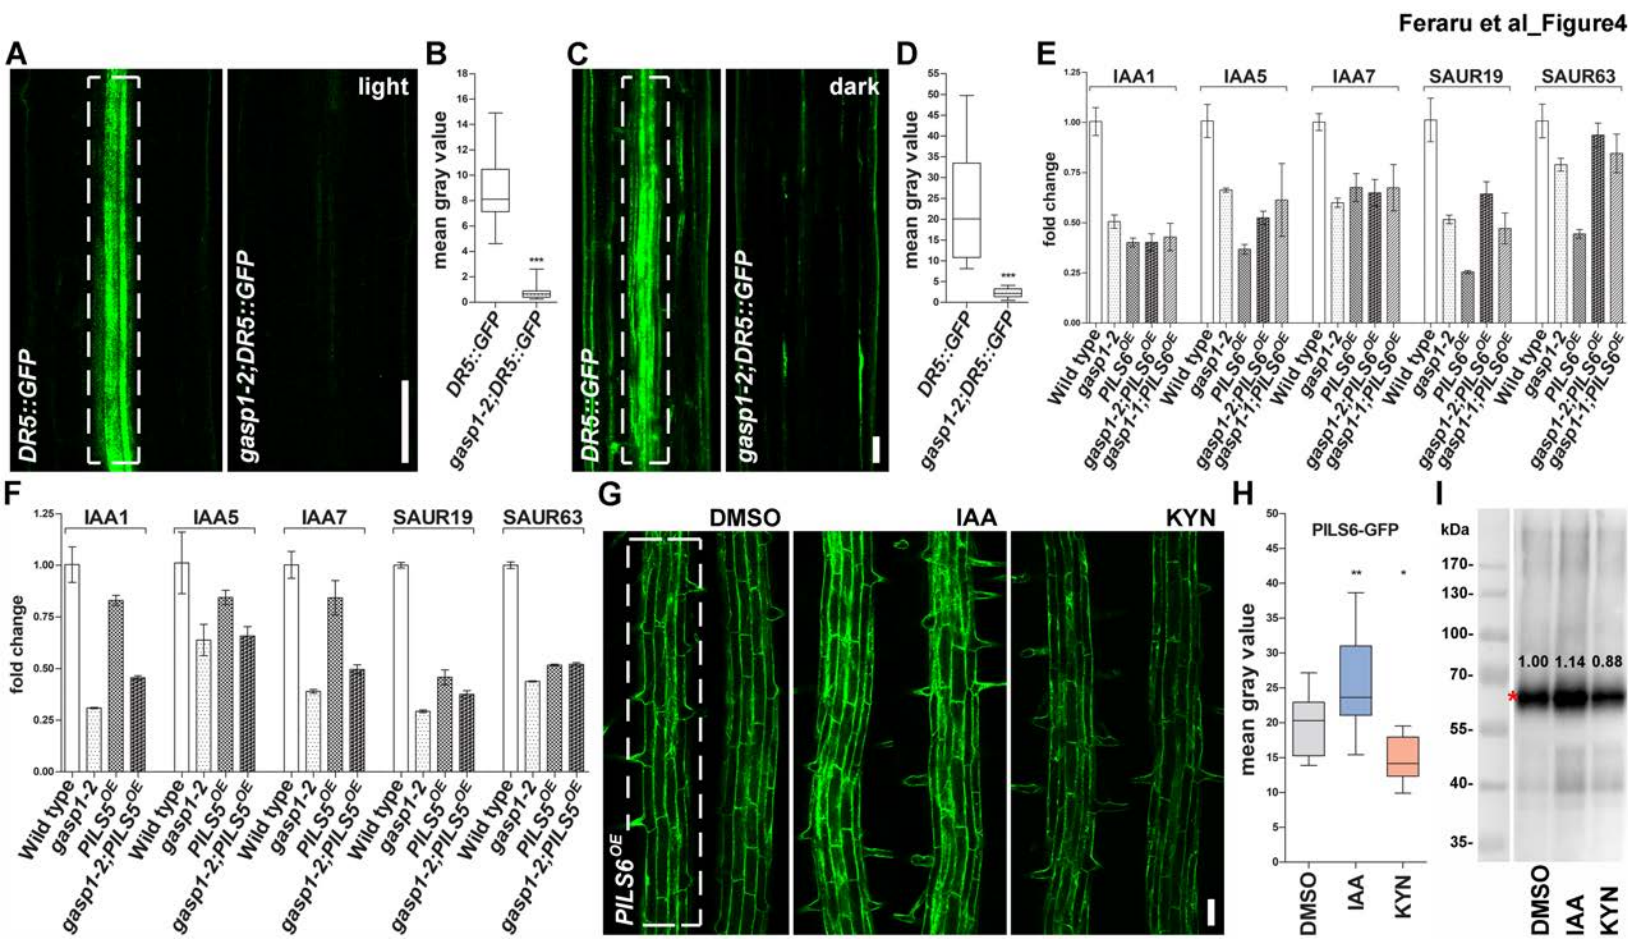

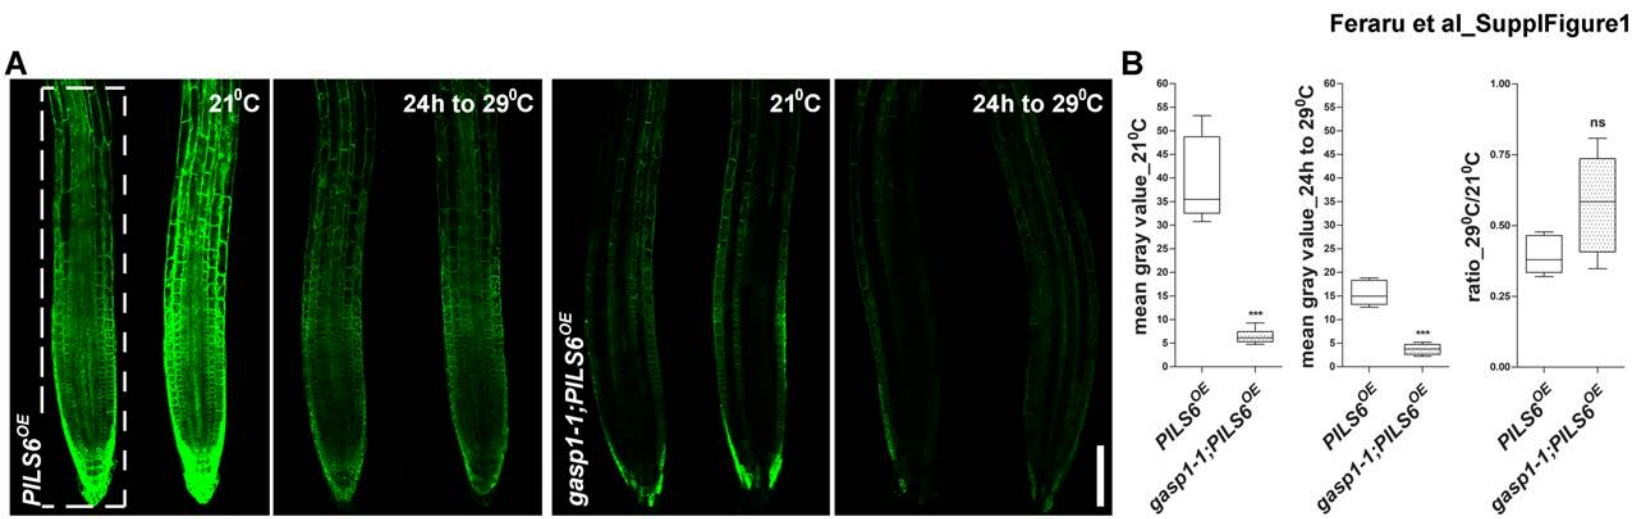

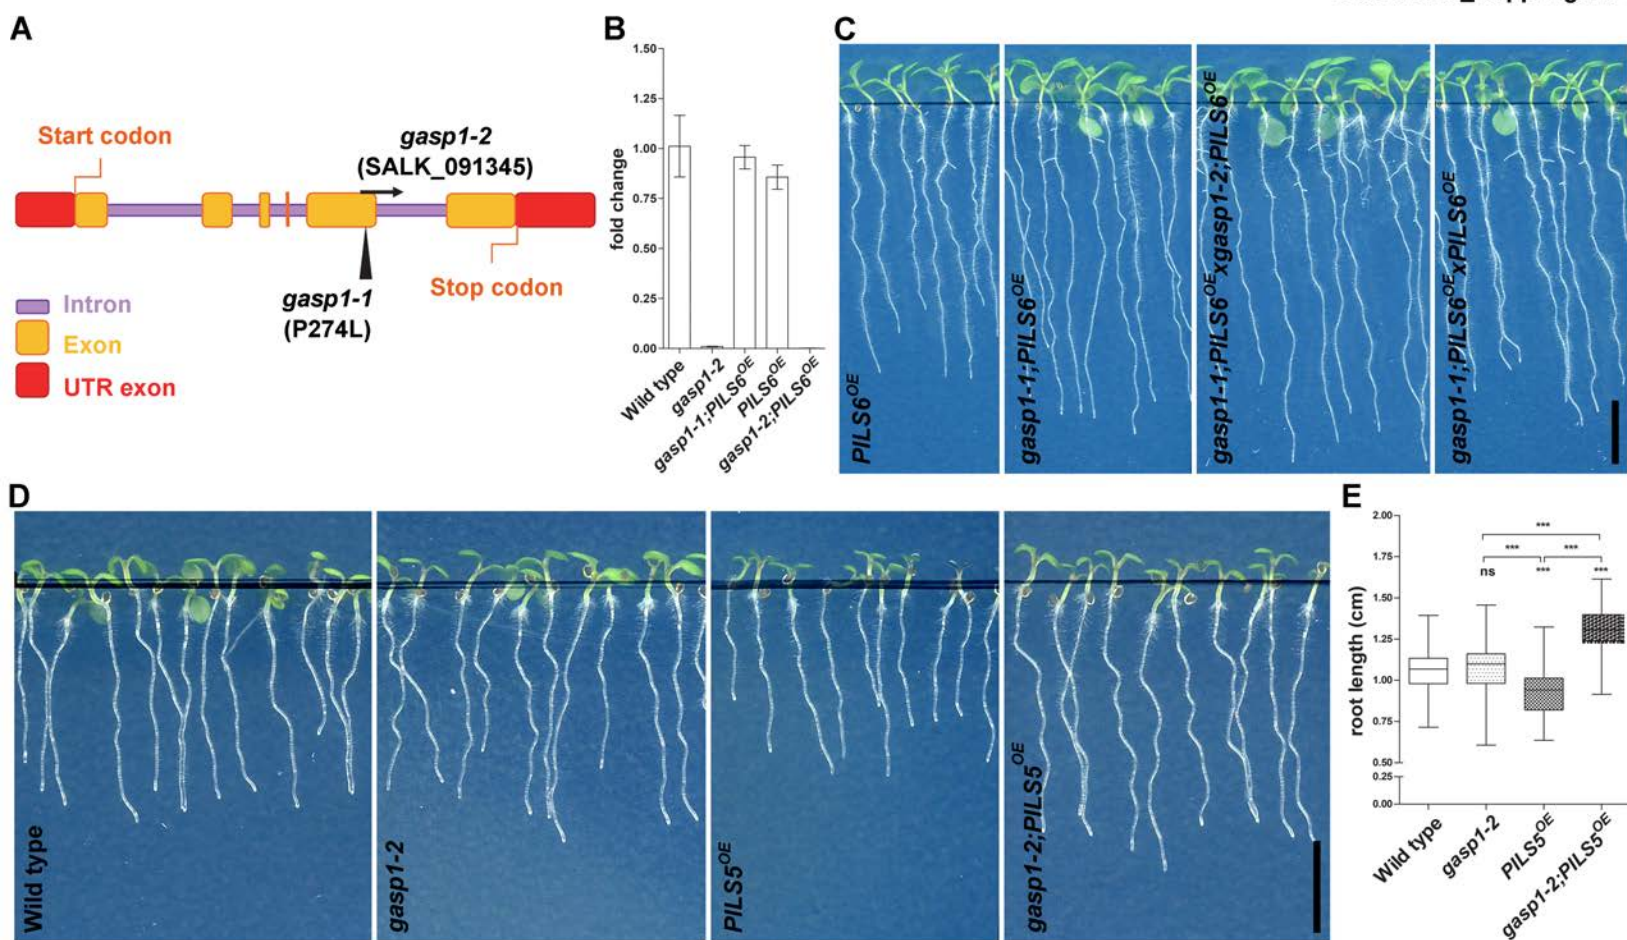

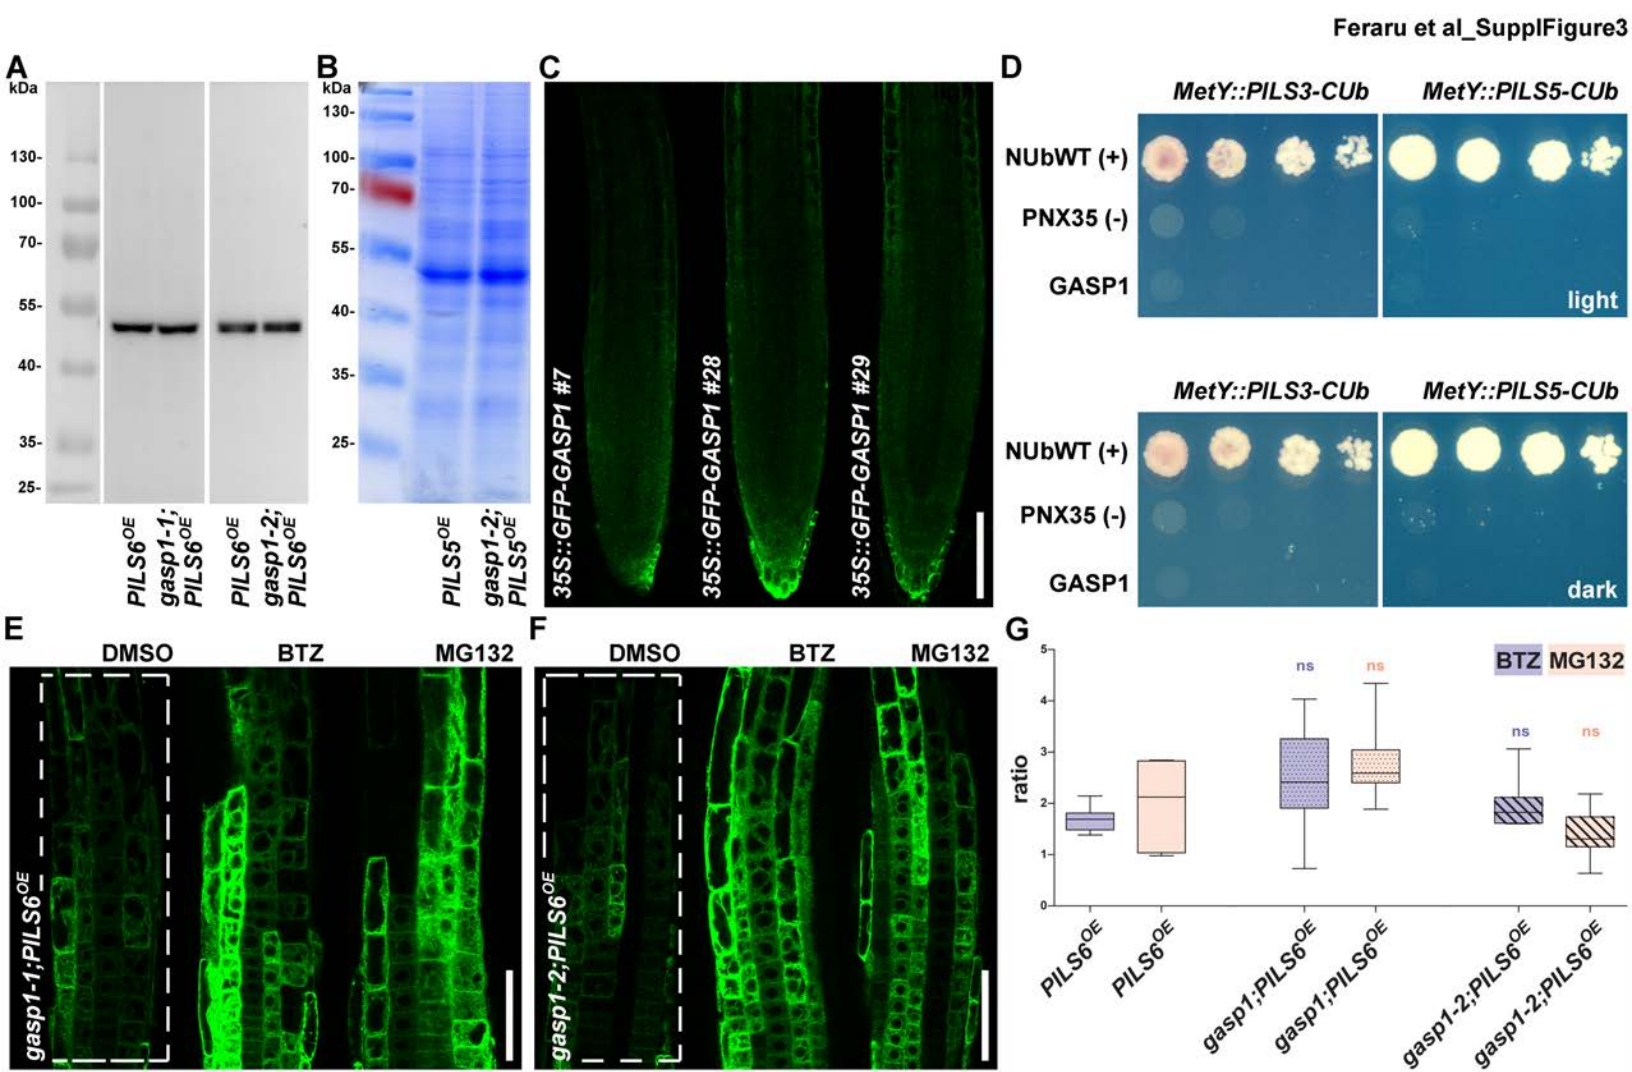



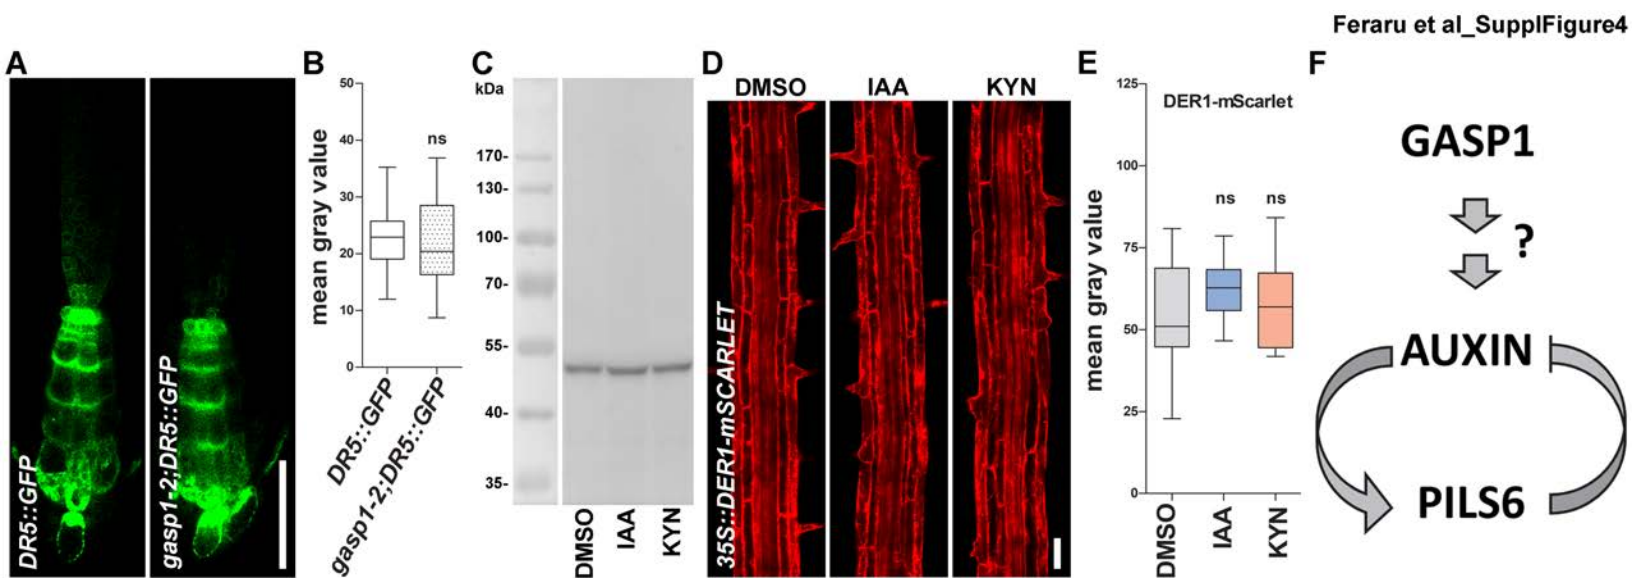

Source: https://www.biorxiv.org/content/10.1101/2022.04.28.489893v1.full.pdf
